# Supplementary material for: Molecular signatures and lineage diversification of neurogenic and gliogenic radial glia in the gyrencephalic ferret cortex
Source: Research Square preprint supplement (doi:10.21203/rs.3.rs-8062841/v1), 2025-11-28
Supplement: Supplementary file 1 [file 663f26a1c7e9256ab3794006.pdf]

**A** Human\_GW22 Ferret\_P3

EP, OPC, Trh-IPC, APC, PyN-IPC, E-IRG, T-IRG, oRG, Cylcing cells

**B** Cycling cells

oRG

E-IRG

T-IRG

PyN-IPC

Genes: *MIK17*, *TOP2A*, *AURKA*, *CCN1*, *CRYAB*, *FOXJ1*, *SLIT2*, *BMP7*, *DIO2*, *HOPX*, *SPRY1*, *ADCYAP1R1*, *ADOR2B*, *ETV5*, *SPRY2*, *ASCL1*, *HES6*, *INSM1*, *EGFR*, *FOMES*, *NEUROG2*, *NEUROG1*, *NEUROD4*

**Figure S1. Expression of cell-type-specific markers in scRNA-Seq data from human GW22 and ferret P3 cortices. (A)** Cluster-resolved UMAP (from Fig. 1B) showing RG and IPC populations in the human and ferret cortices. **(B)** UMAP plots showing gene expression in human and ferret cortical progenitors. Note that key components of the cortical PKA signaling, including *ADCYAP1R1*, *ADORA2B*, and *DIO2*, demonstrate significantly elevated expression levels in oRGs. oRG, outer radial glia; E-tRG, ependymocyte-generating truncated radial glia, T-tRG, Tri-IPC-generating tRG; PyN-IPC, PyN intermediate progenitor cells.

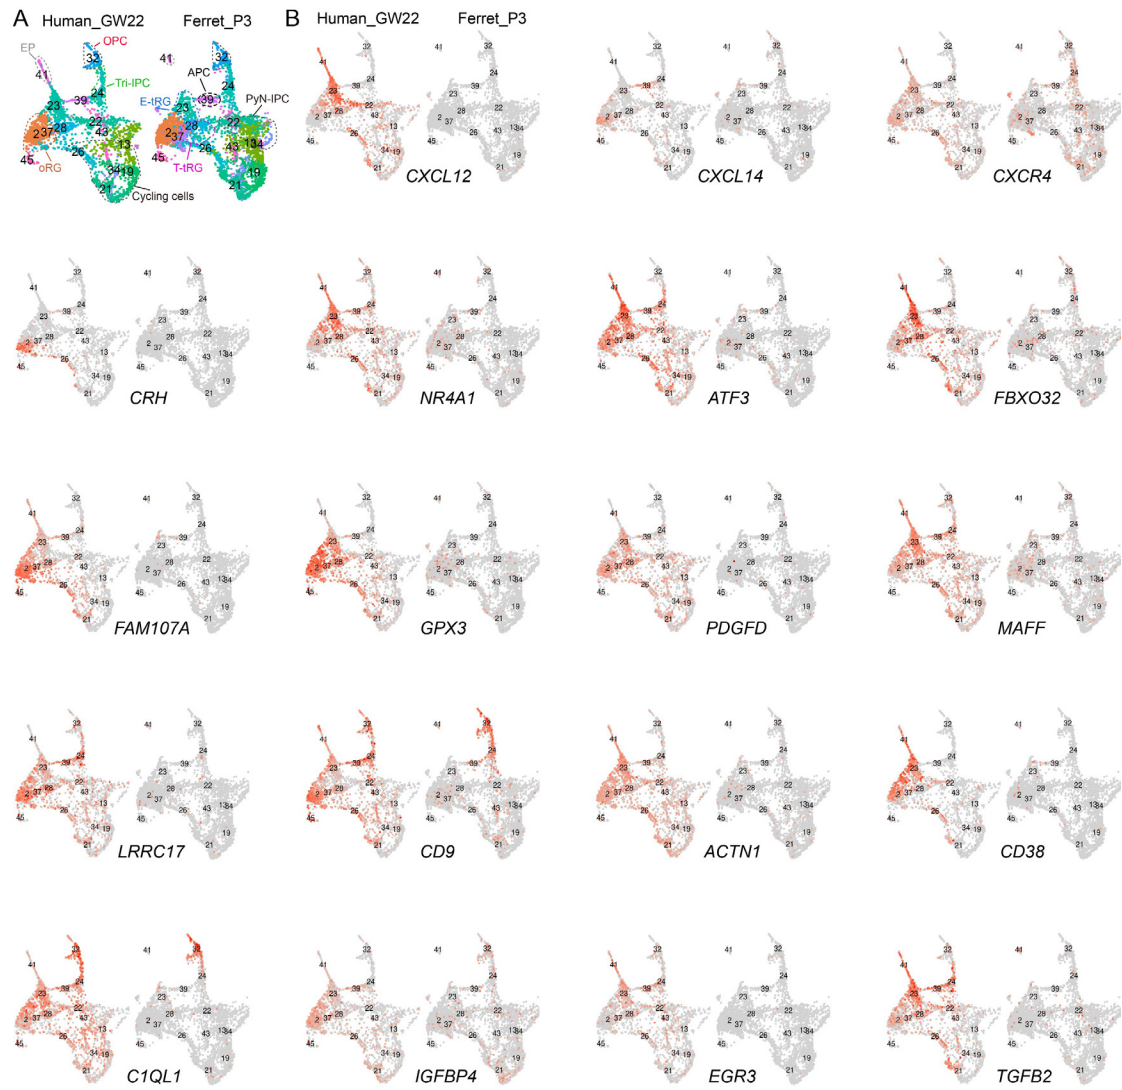

**Figure S2. Divergent expression patterns of cell-type-specific markers between human (GW22) and ferret (P3) cortical RGs. (A)** UMAP (from Fig. 1B) showing RG and IPC populations. **(B)** Highlighted genes exhibit robust expression in human cortical RGs but minimal or absent expression in ferret cortical RGs.

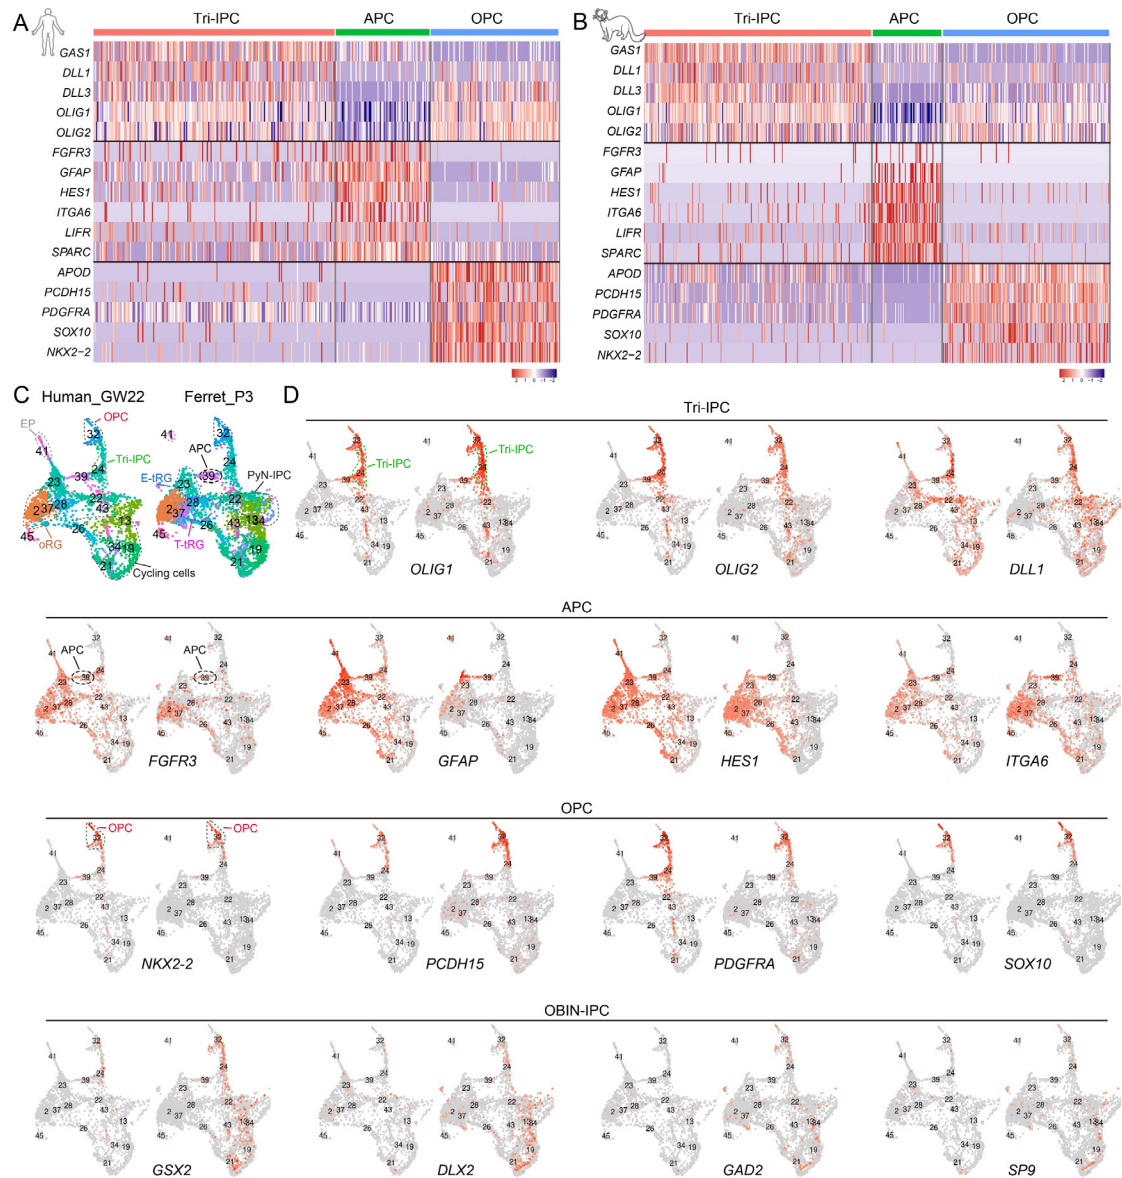

**Figure S3. The molecular signatures of human and ferret cortical Tri-IPCs, APCs, and OPCs. (A, B)** Heatmap of conserved gene expression in human (GW22) vs. ferret (P3) cortical Tri-IPCs, APCs, and OPCs. **(C)** UMAP (from Fig. 1B) showing cortical RG and IPC populations. **(D)** UMAP projections of gene expression in human (GW22) and ferret (P3) cortical Tri-IPCs, APCs, and OPCs reveal that the absence of a distinct OBIN-IPC cluster adjacent to Tri-IPCs suggests limited derivation of OBIN-IPCs from Tri-IPCs in both GW22 human and P3 ferret cortices. Tri-IPCs, tripotential intermediate progenitor cells; APC, astrocyte-IPCs; OPC, oligodendrocyte-IPCs; OBIN-IPC, IPCs for cortically derived olfactory bulb interneuron.



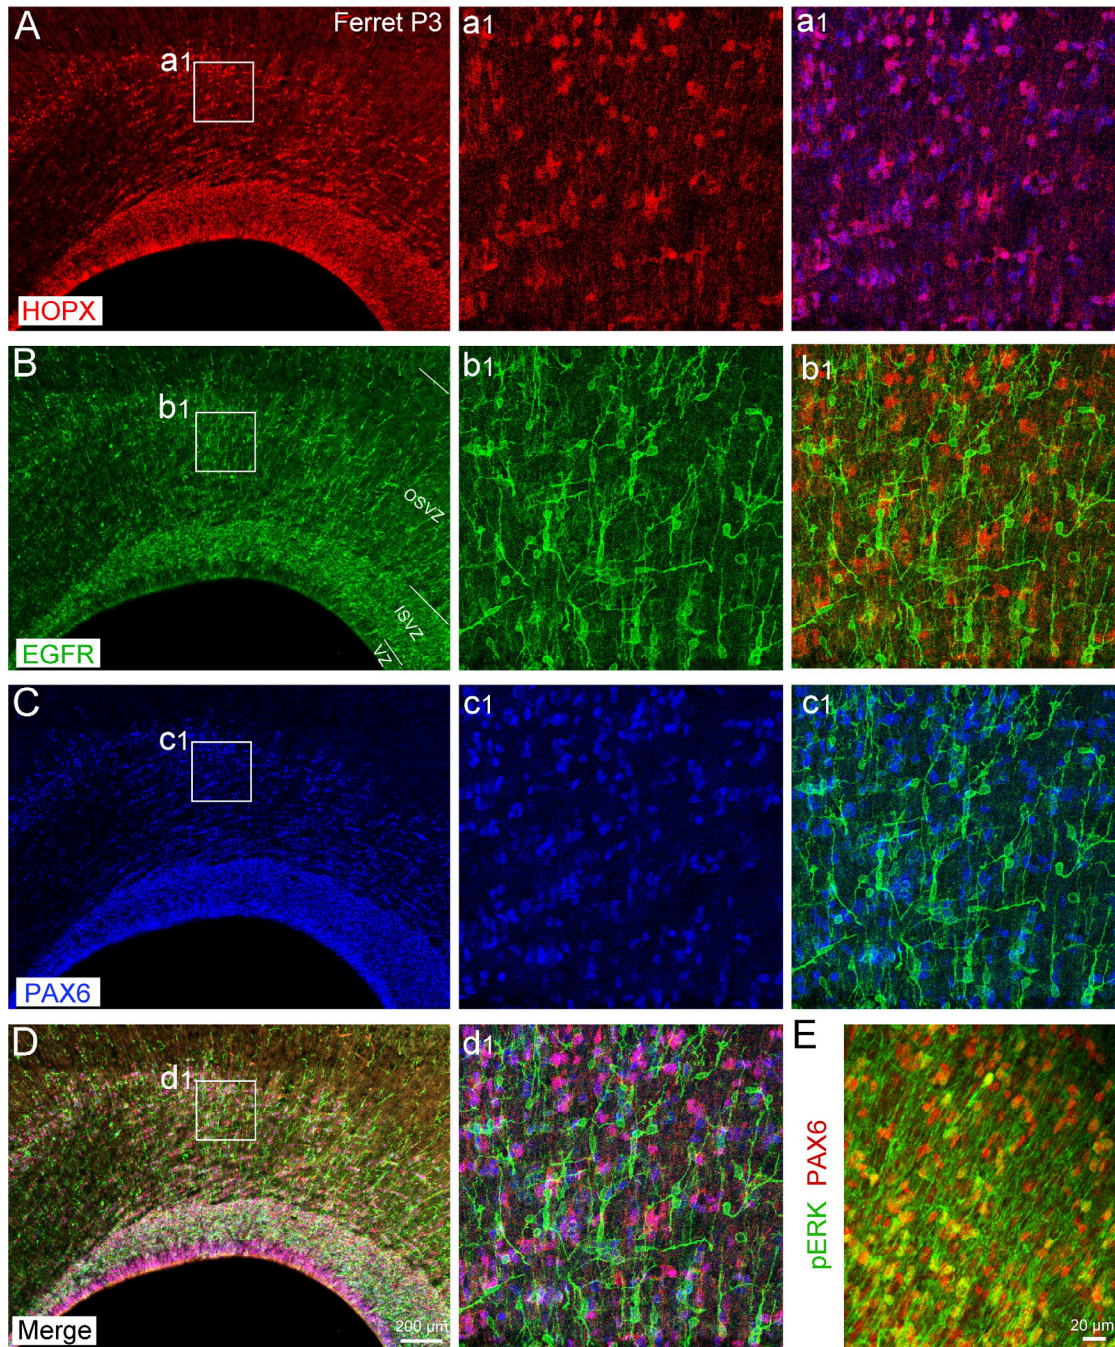

**Figure S4. Ferret oRGs do not express EGFR.** (A-D) Triple immunostaining for HOPX/PAX6/EGFR revealing that P3 ferret cortical oRGs express HOPX and PAX6, but not EGFR. (E) P3 cortical oRG express PAX6 and pERK.



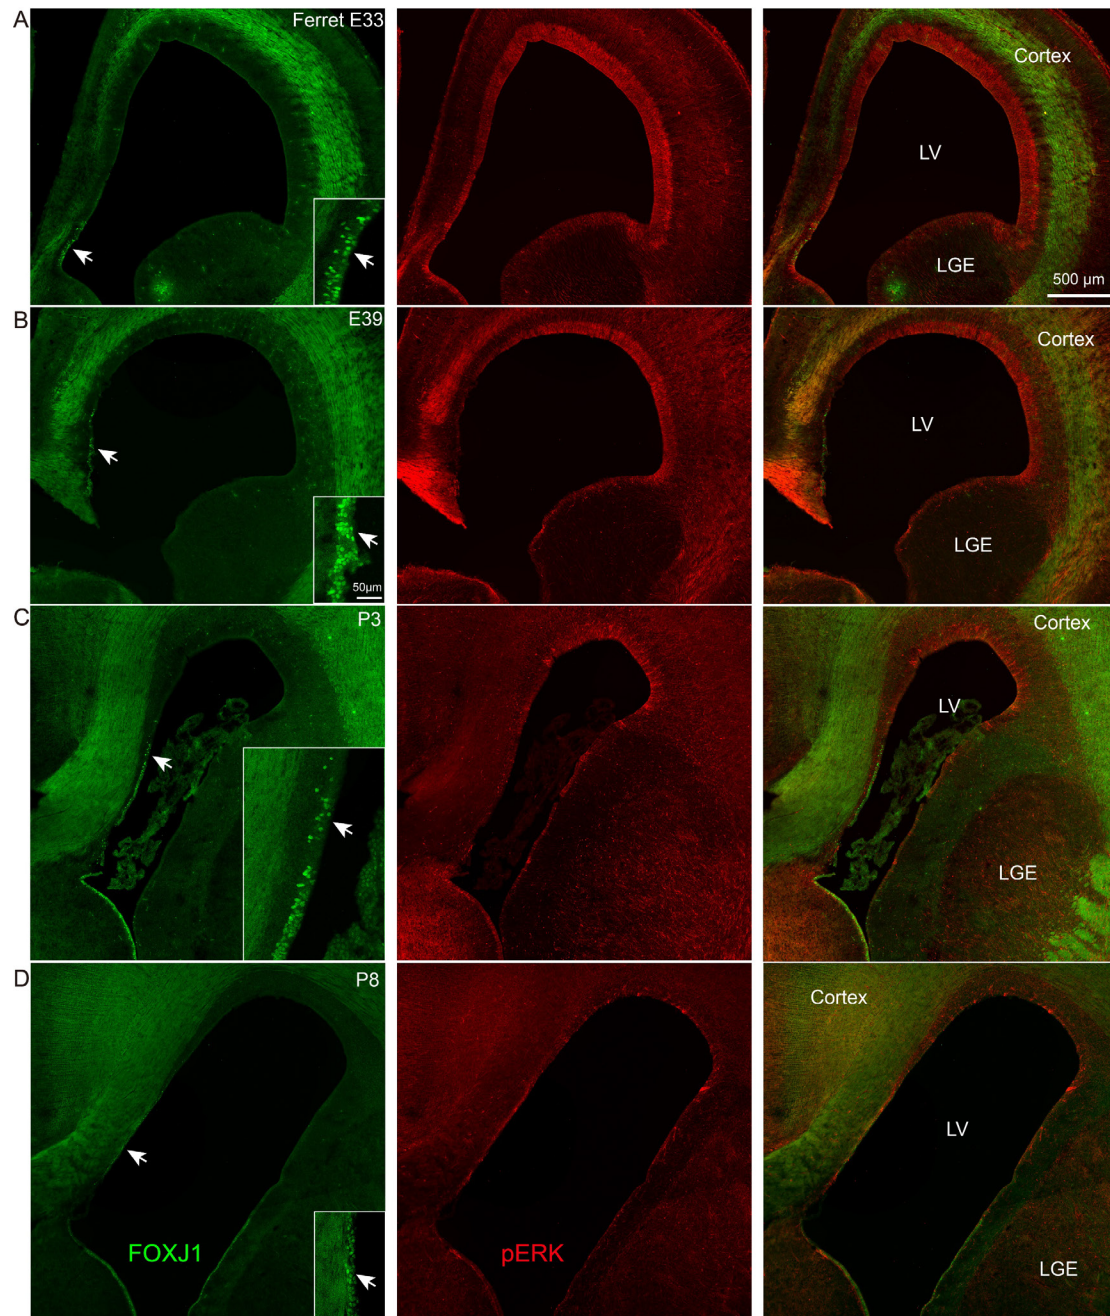

**Figure S5. Spatiotemporal expansion of FOXJ1+ E-tRGs in developing ferret cortex. (A-D)** FOXJ1/pERK co-staining reveals medial-to-lateral expansion of FOXJ1+ cells in cortical VZ, accompanied by a complementary medial-low to lateral-high pERK gradient (E33-P3). Note that the marked pERK reduction in lateral cortical VZ at P8 may result from both YAP and SHH signaling activation in late corticogenesis.

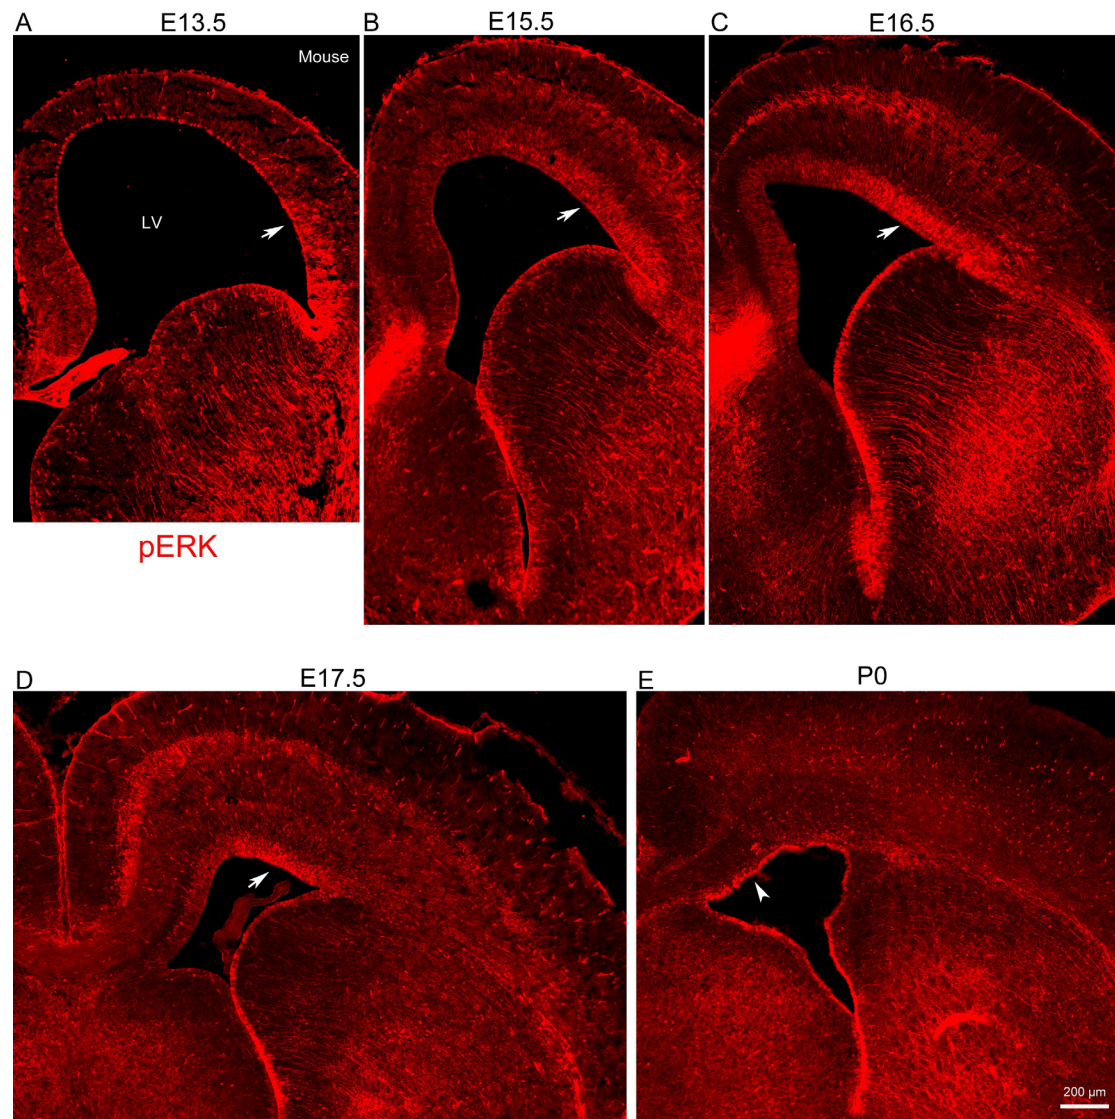

**Figure S6. Spatiotemporal dynamics of pERK signaling in developing mouse cortex.** (A-D) pERK immunostaining (E13.5-E17.5) demonstrates a consistent medial-low to lateral-high gradient in mouse cortical VZ. Notably, pERK expression is likely restored in medial cortical VZ by P0.



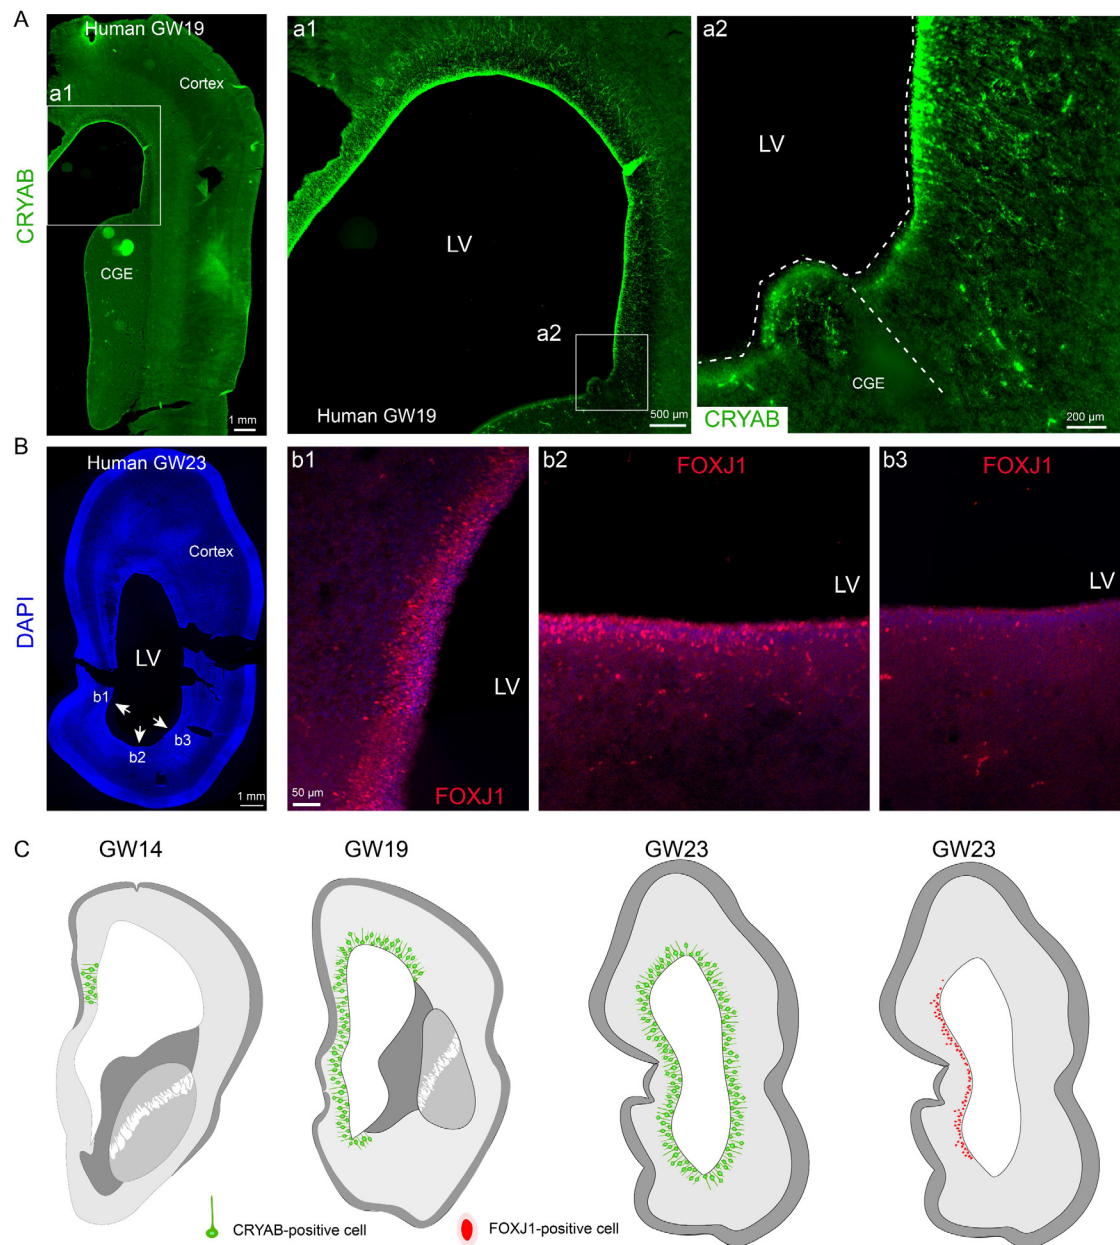

**Figure S7. Spatiotemporal expression of CRYAB and FOXJ1 in developing human cortex.** (A) CRYAB is specifically expressed in cortical VZ, but absent from ganglionic eminence VZ at GW19. (B) FOXJ1 shows medial-enriched expression in human cortical VZ at GW23. (C) Schematic summarizing CRYAB and FOXJ1 expression patterns across developmental stages (GW14, GW19, GW23). CGE, caudal ganglionic eminence.

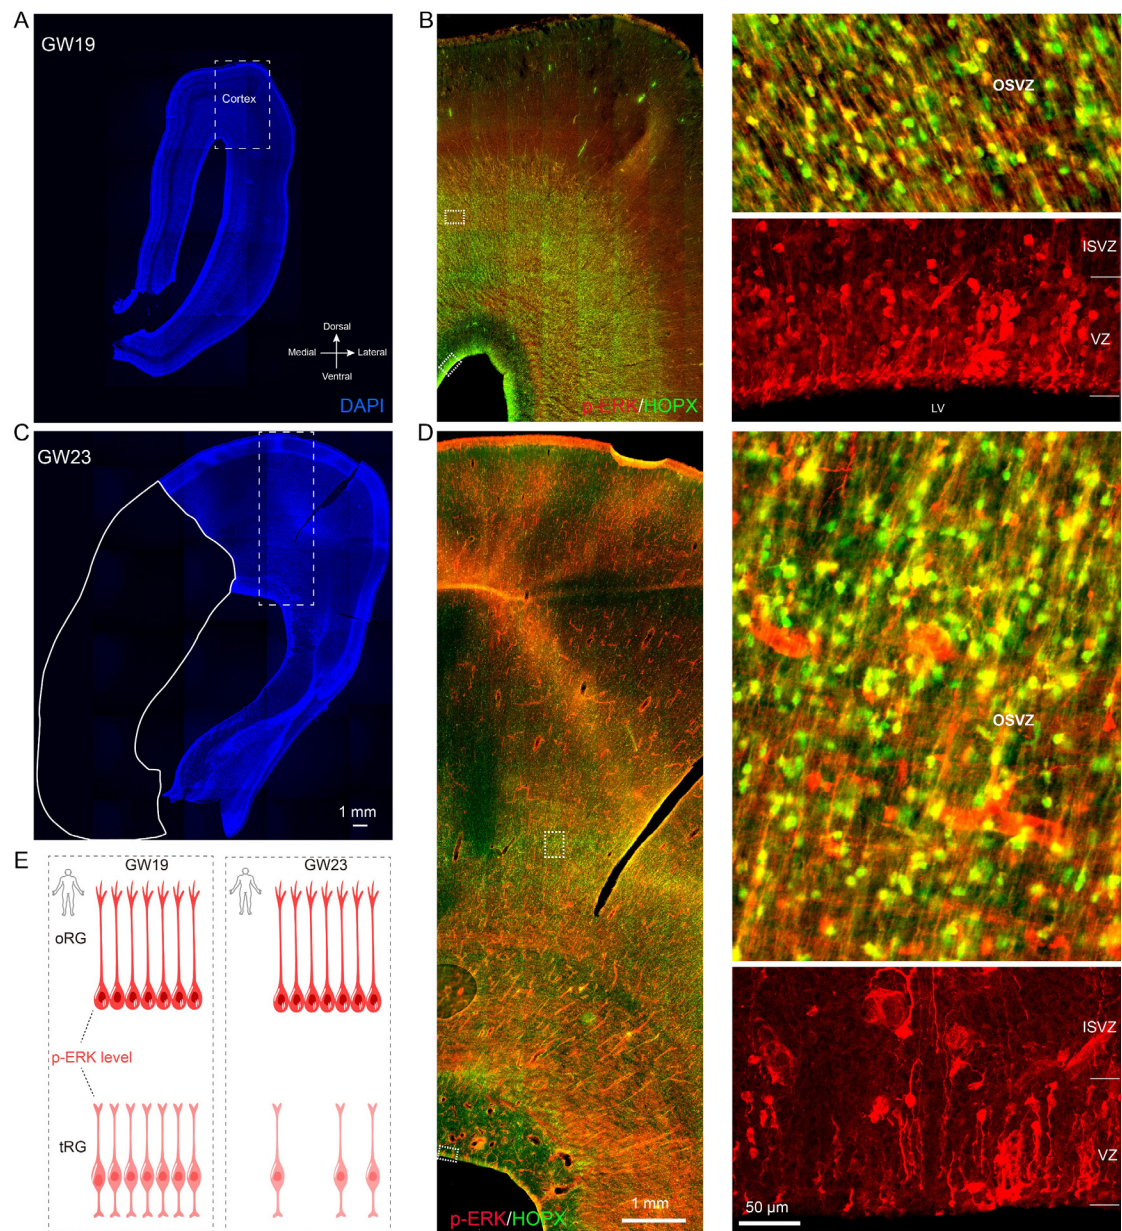

**Figure S8. Developmental downregulation of ERK signaling in human cortical VZ.** (A, B) At GW19, most tRGs exhibit low pERK levels in the VZ, while oRGs maintain high pERK/HOPX co-expression in the OSVZ. (C, D) By GW23, the population of pERK-positive tRGs shows significant reduction in the VZ, whereas oRGs persistently exhibit robust pERK and HOPX co-expression in the OSVZ. (E) Schematic depicting progressive ERK signaling attenuation in cortical VZ (GW19-GW23), potentially mediated by increasing YAP and SHH pathway activity.



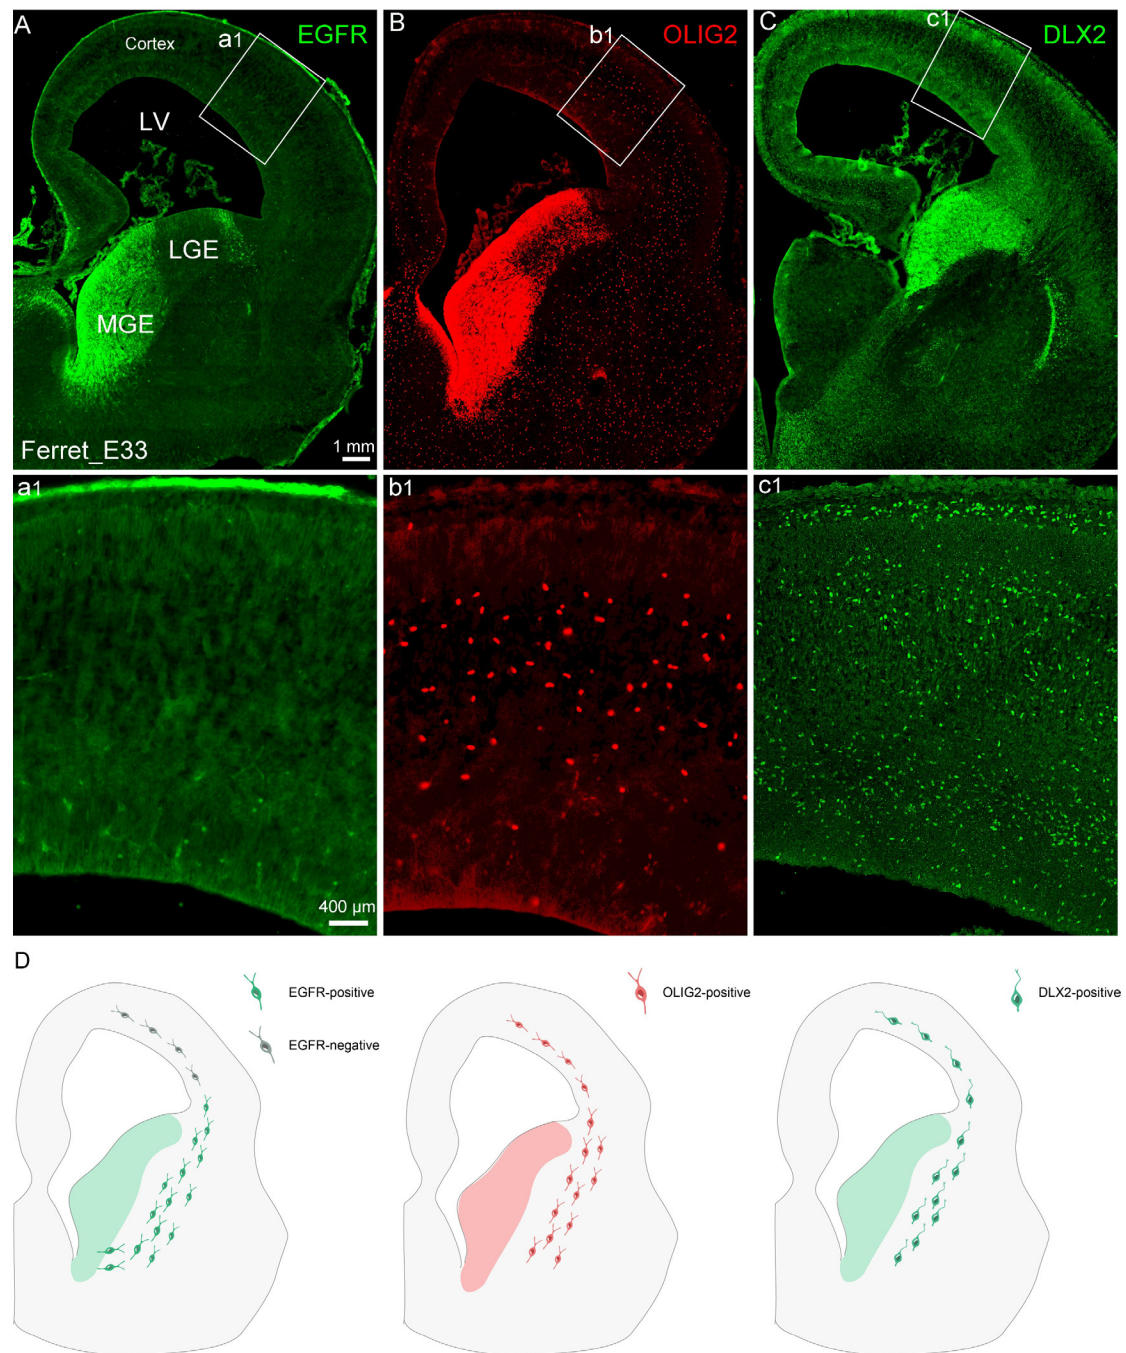

**Figure S9. Ventral ganglionic eminence-derived cortical interneurons and OPCs downregulate EGFR expression upon cortical entry.** (A-C) Coronal sections of E33 ferret brain stained for EGFR, OLIG2, and DLX2, with cortical boxed areas shown at higher magnification. (D) Schematic model demonstrating that ventral ganglionic eminence-derived cells maintain lineage markers (DLX2+ interneurons and OLIG2+ OPCs) while completely suppressing EGFR expression during cortical entry. MGE, medial ganglionic eminence.

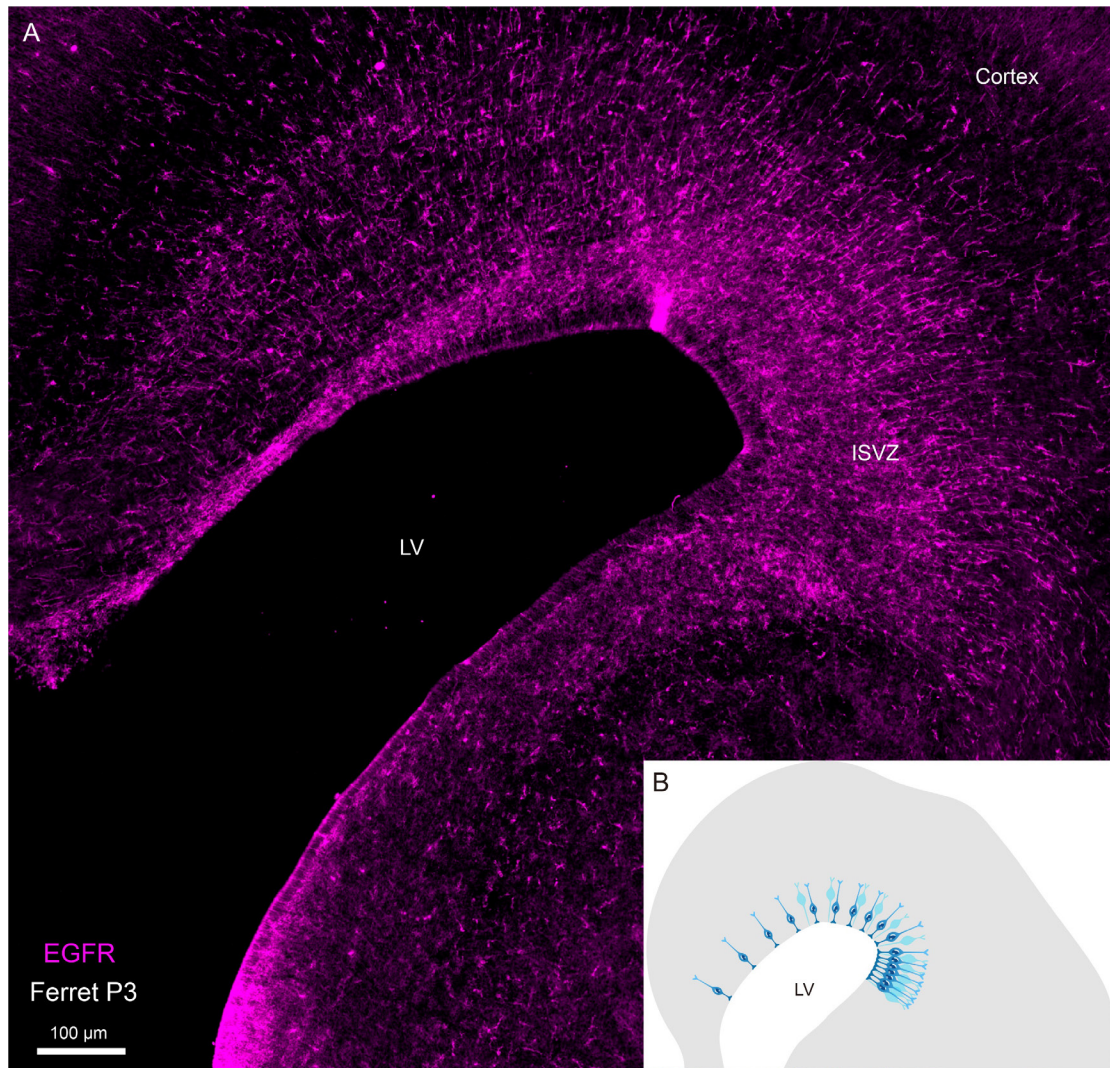

**Figure S10. Mediolateral EGFR gradient in the P3 ferret cortical SVZ.** (A) EGFR immunostaining in the P3 ferret cortex reveals that T-tRGs generate Tri-IPCs through lateral-to-medial progression. (B) Schematic model of EGFR expression patterns (medial-low to lateral-high) in neonatal ferret VZ/SVZ.



**Table S1. scRNA-seq characterization of GW22 human cortex.** Cluster identities: oRGs (cluster 2), E-tRGs (23), T-tRGs (28), Tri-IPCs (24), APCs (39), OPCs (32). Lists differentially expressed genes (DEGs) for: oRGs vs T-tRGs, E-tRGs vs T-tRGs, and E-tRGs vs oRGs in the GW22 human cortex.

**Table S2. scRNA-seq characterization of P3 ferret cortex.** Cluster identities: oRGs (cluster 2), E-tRGs (23), T-tRGs (28), Tri-IPCs (24), APCs (39), OPCs (32). Lists DEGs for: oRGs vs T-tRGs, E-tRGs vs T-tRGs, and E-tRGs vs oRGs in the P3 ferret cortex.

**Table S3. Cross-species scRNA-seq analysis (human GW22 vs ferret P3 cortex).** Shows DEGs between homologous populations: oRGs, E-tRGs, T-tRGs, Tri-IPCs, APCs, and OPCs.
